# Supplementary material for: Full-spectrum-activated Z-scheme photocatalysts based on NaYF4:Yb3+/Er3+, TiO2 and Ag6Si2O7
Source: Royal Society of Chemistry journal article supplement (doi:10.1039/c7ta07529d), 2017-01-01
Supplement: c7ta07529d1.pdf [file c7ta07529d1.pdf]

**Full-Spectrum-Activated Z-scheme Photocatalysts based on NaYF<sub>4</sub>: Yb<sup>3+</sup>/Er<sup>3+</sup>,  
TiO<sub>2</sub> and Ag<sub>6</sub>Si<sub>2</sub>O<sub>7</sub>**

*Qingyong Tian,<sup>a</sup> Weijing Yao,<sup>a</sup> Zhaohui Wu,<sup>c</sup> Jun Liu,<sup>a</sup> Li Liu,<sup>a</sup> Wei Wu<sup>a, b\*</sup>*

*Changzhong Jiang<sup>\*</sup>*

<sup>a</sup> School of Printing and Packaging and School of Physics and Technology, Wuhan  
University, Wuhan 430072, P. R. China.

<sup>b</sup> Suzhou Research Institute of Wuhan University, Suzhou 215000, P. R. China.

<sup>c</sup> Hunan Key Laboratory of Applied Environmental Photocatalysis, Changsha  
University, Changsha 410022, P. R. China.

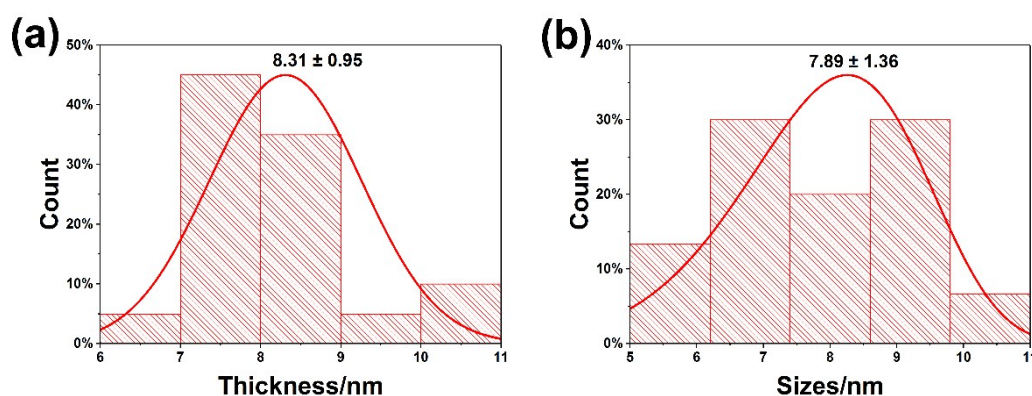

**Figure S1** The corresponding histogram of (a) thickness of TiO<sub>2</sub> NSs, (b) sizes of ASO NPs decorated on NaYF<sub>4</sub>@T (S10).

---

\*To whom correspondence should be addressed. Tel: +86-27-68778529. Fax: +86-27-68778433. E-mail: [weiwu@whu.edu.cn](mailto:weiwu@whu.edu.cn) (W. Wu) and [czjiang@whu.edu.cn](mailto:czjiang@whu.edu.cn) (C. Jiang).

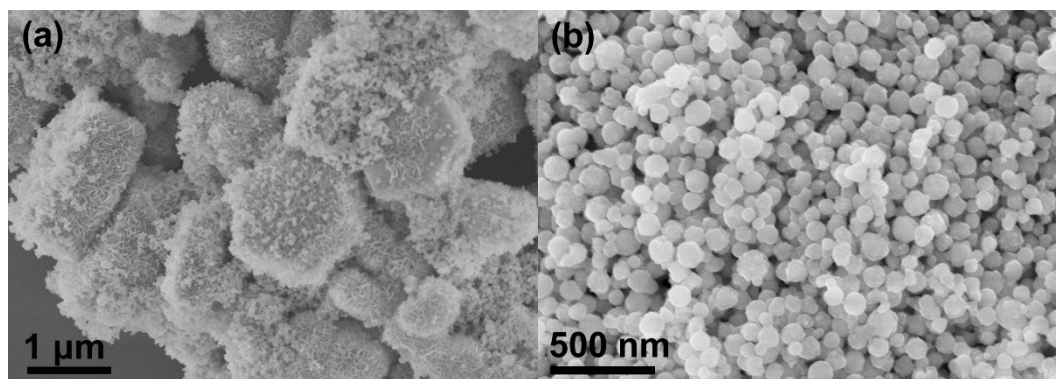

**Figure S2** The SEM image of (a)  $\text{NaYF}_4@\text{T-ASO}$  without surface amination and (b) pure ASO NPs.

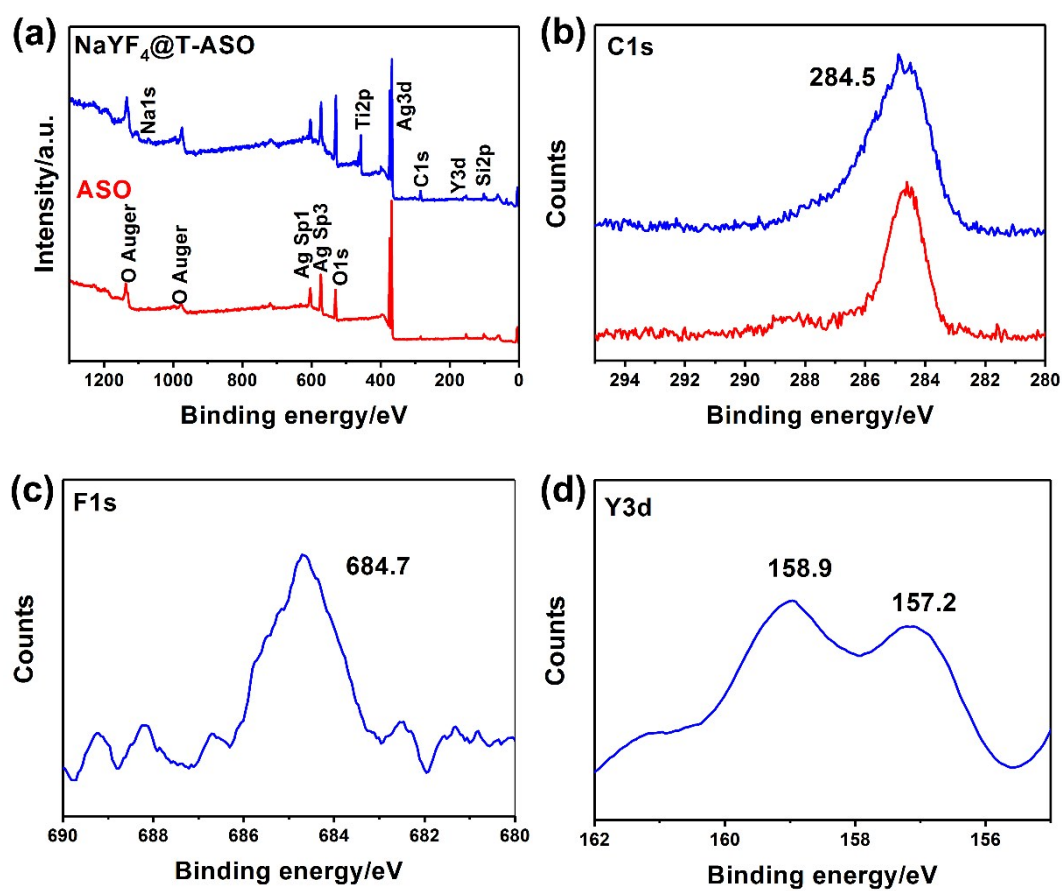

**Figure S3** (a) Survey XPS spectra of  $\text{NaYF}_4@\text{T-ASO}$  (S10) and pure ASO NPs. High-resolution of (b) C 1s, (c) F 1s and (d) Y 3d.

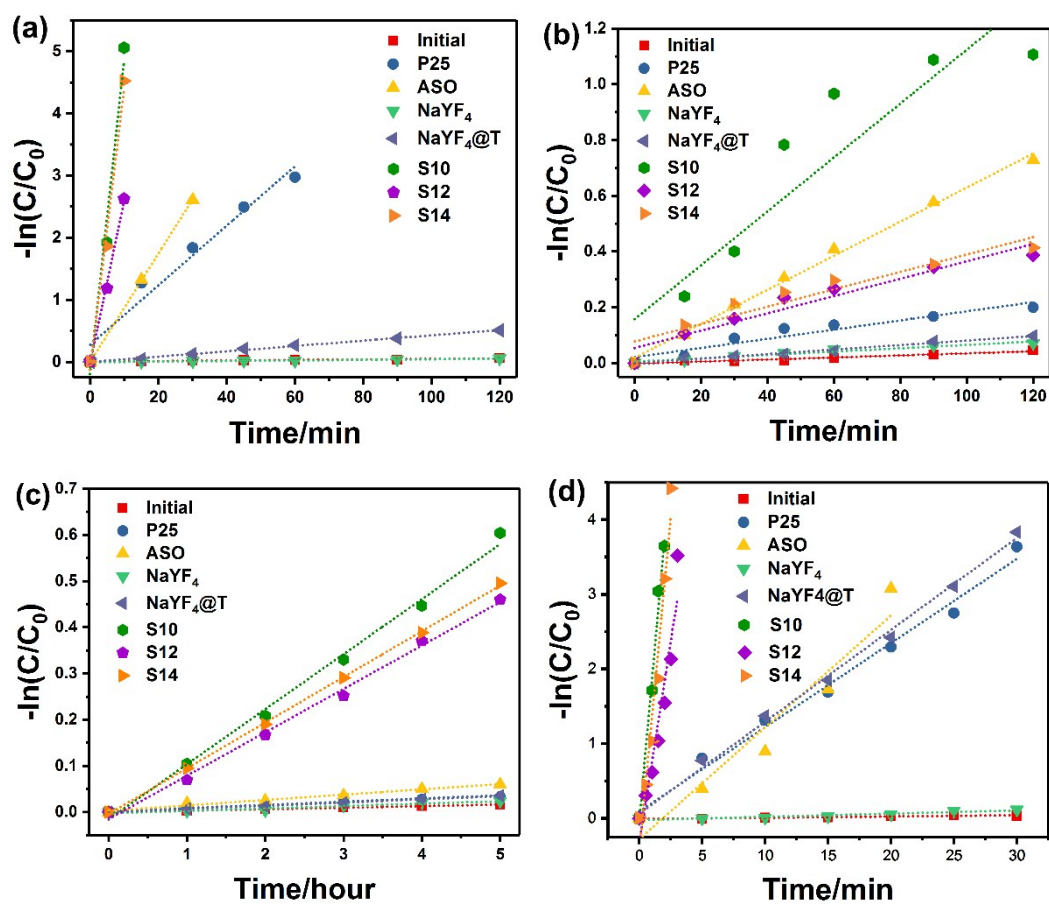

**Figure S4** The degradation rate of the samples under different light source.

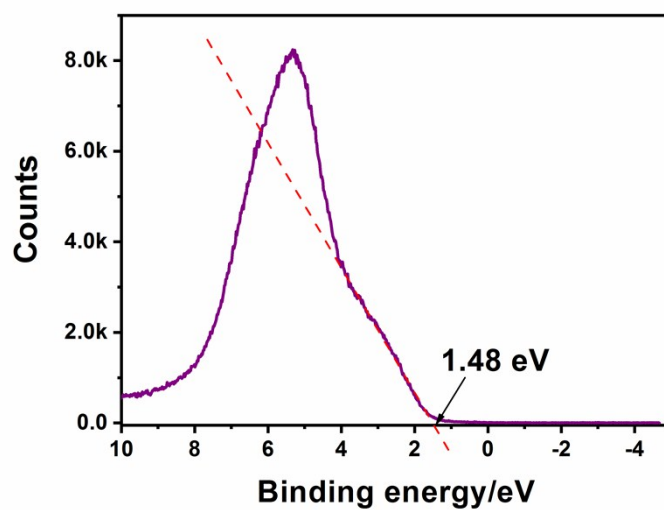

**Figure S5** The XPS valence spectrum of pure ASO NPs.
